# Supplementary material
Source: HighWire-hosted journal article supplement (http://gut.bmjjournals.com/highwire/filestream/193145/field_highwire_adjunct_files/0/gut_figures_302103.pdf)

**A**

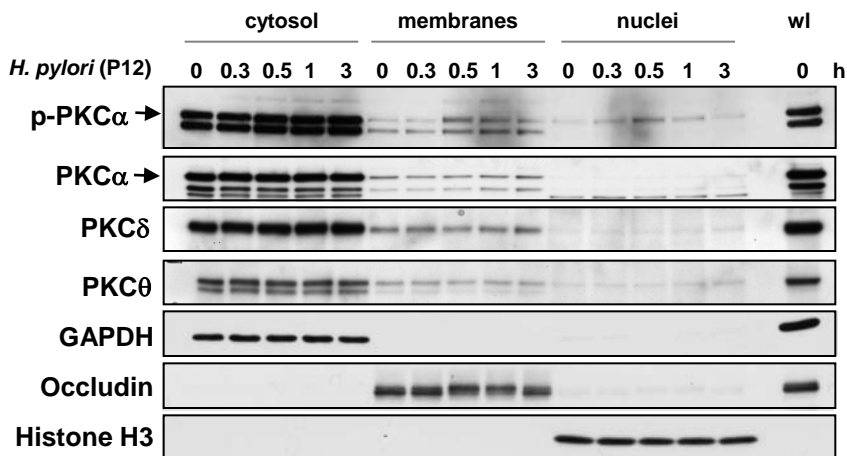

**B**

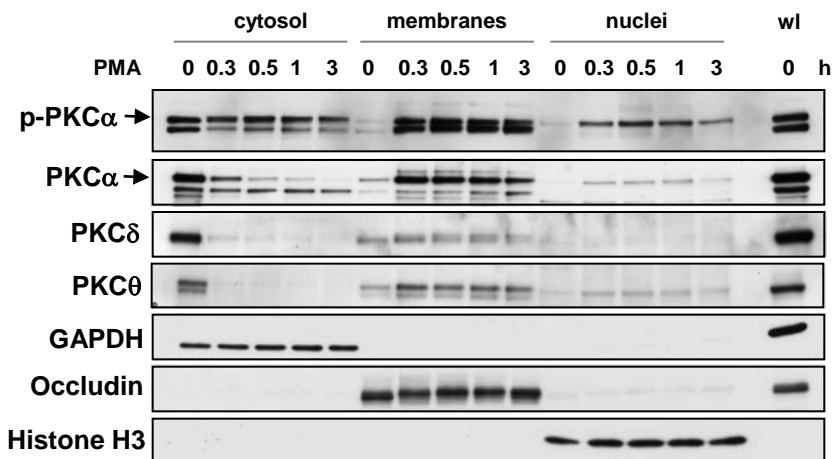

**C**

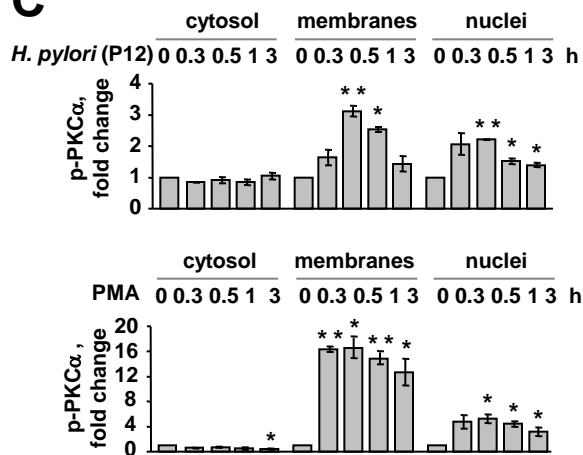

**D**

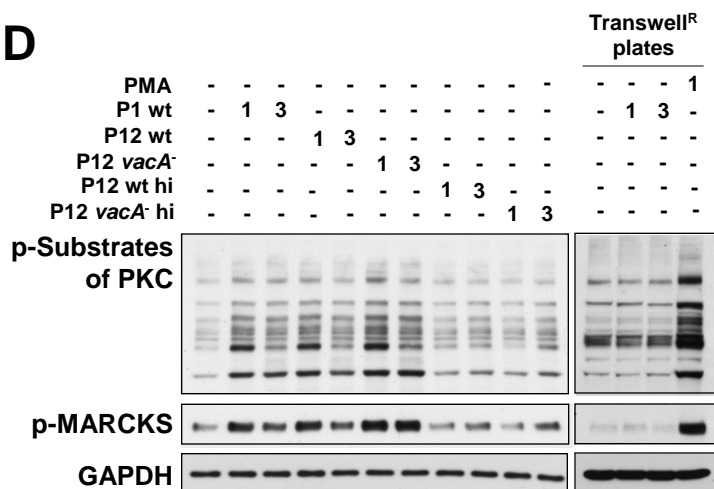

Sokolova et al. Supplementary Figure 2

Non-infected

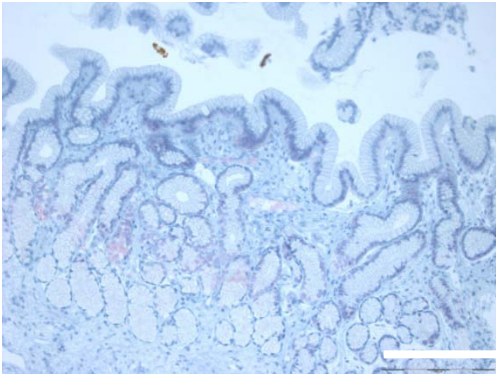

Hp-Gastritis

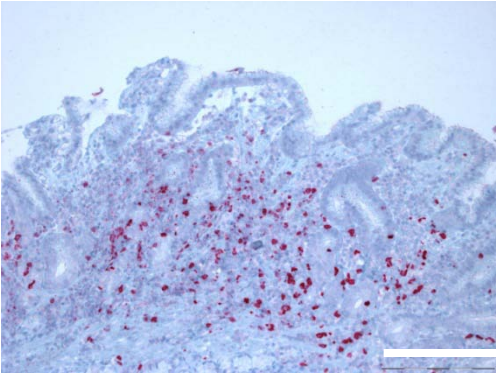

Adenoma

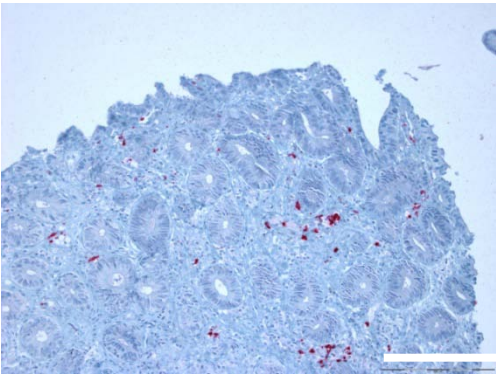

Adenocarcinoma

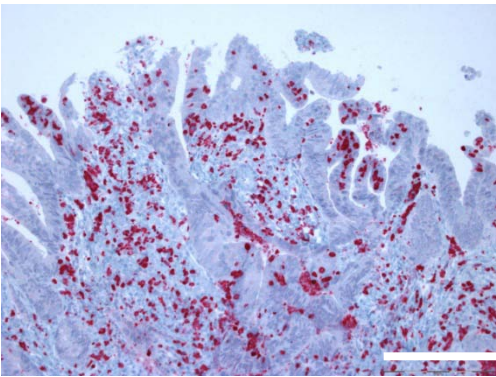

Sokolova et al. Supplementary Figure 3

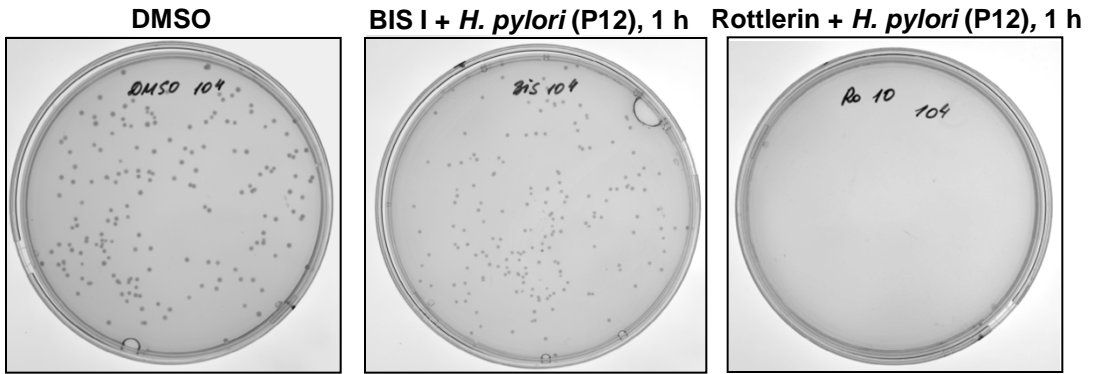

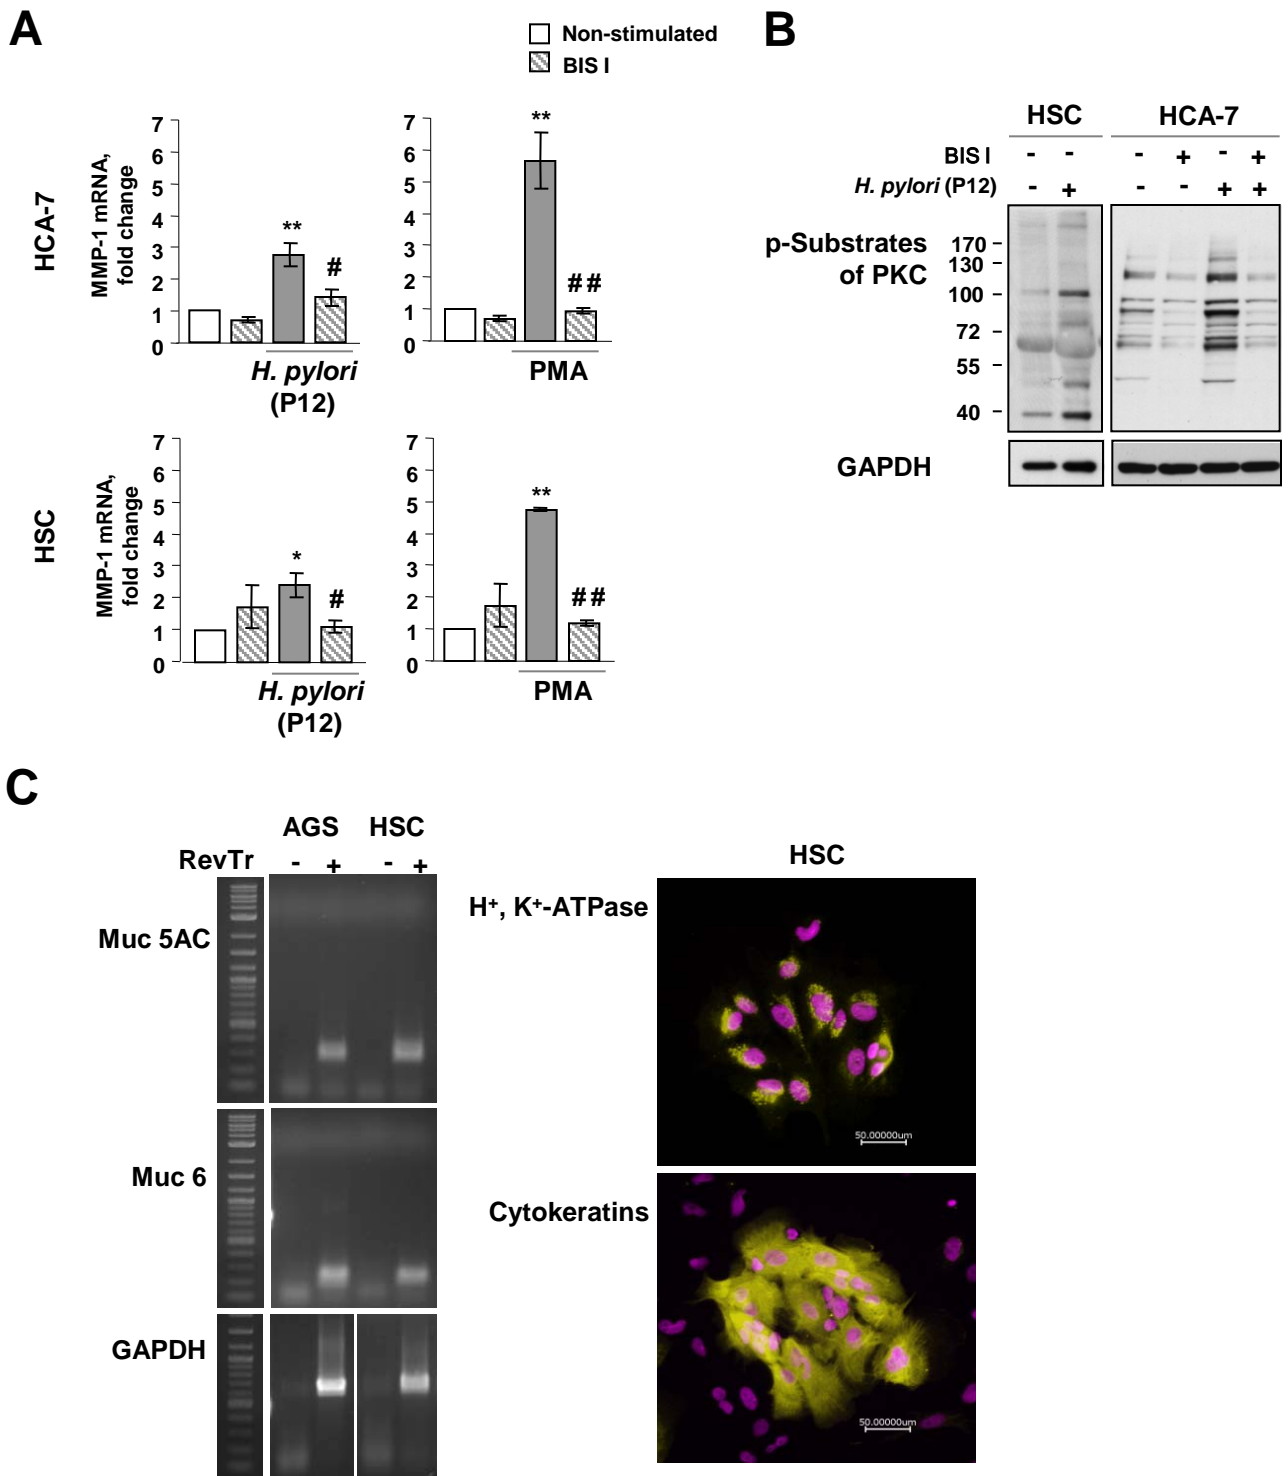

Sokolova et al. Supplementary Figure 5

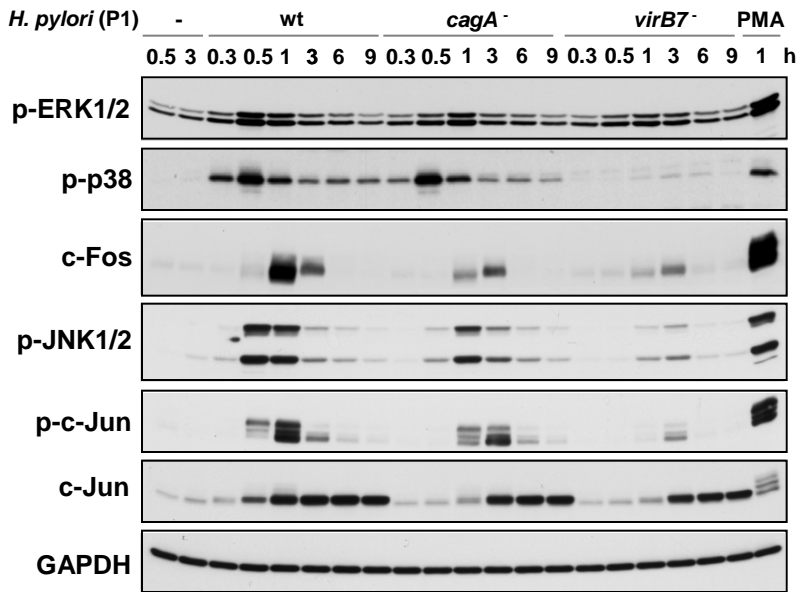

Sokolova et al. Supplementary Figure 6

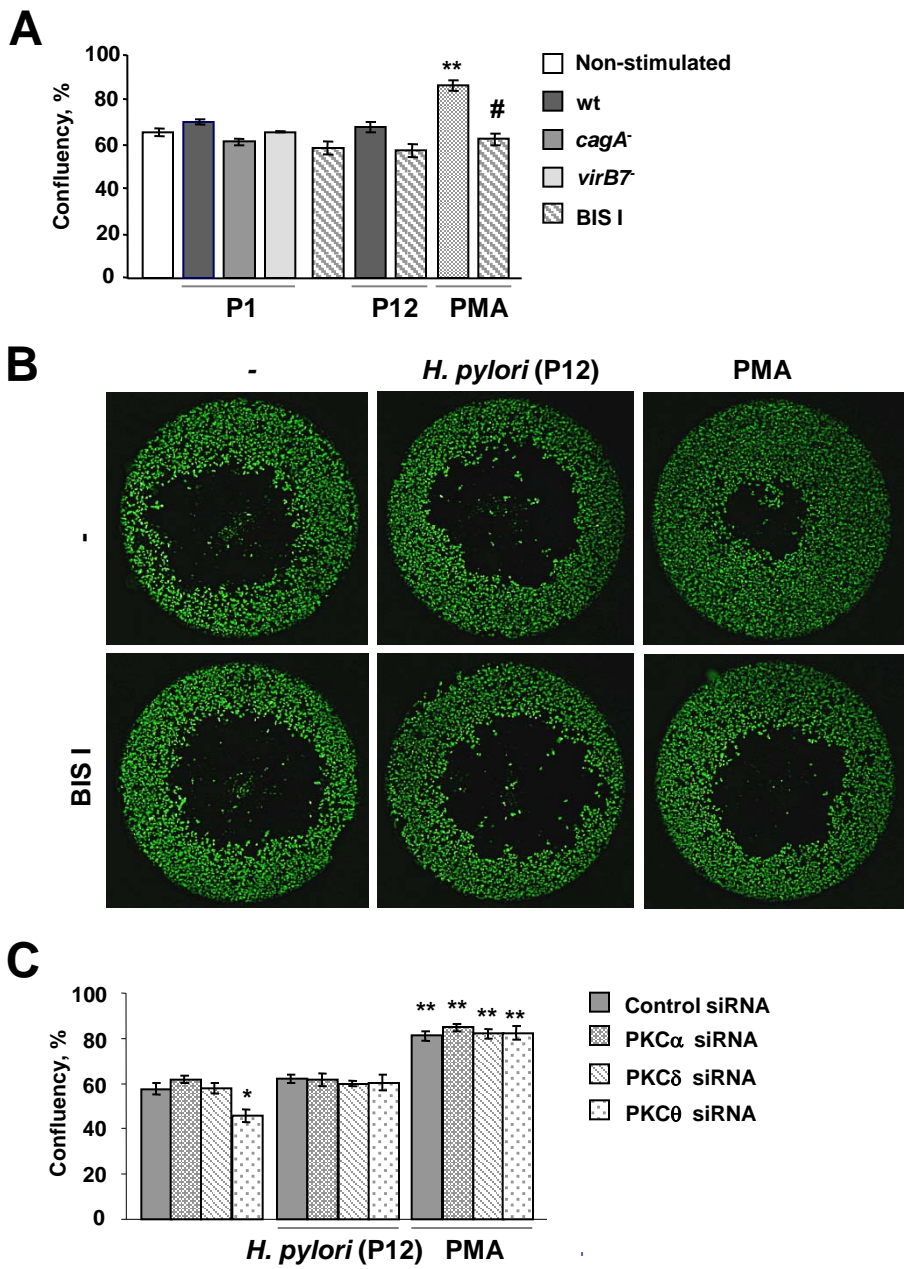

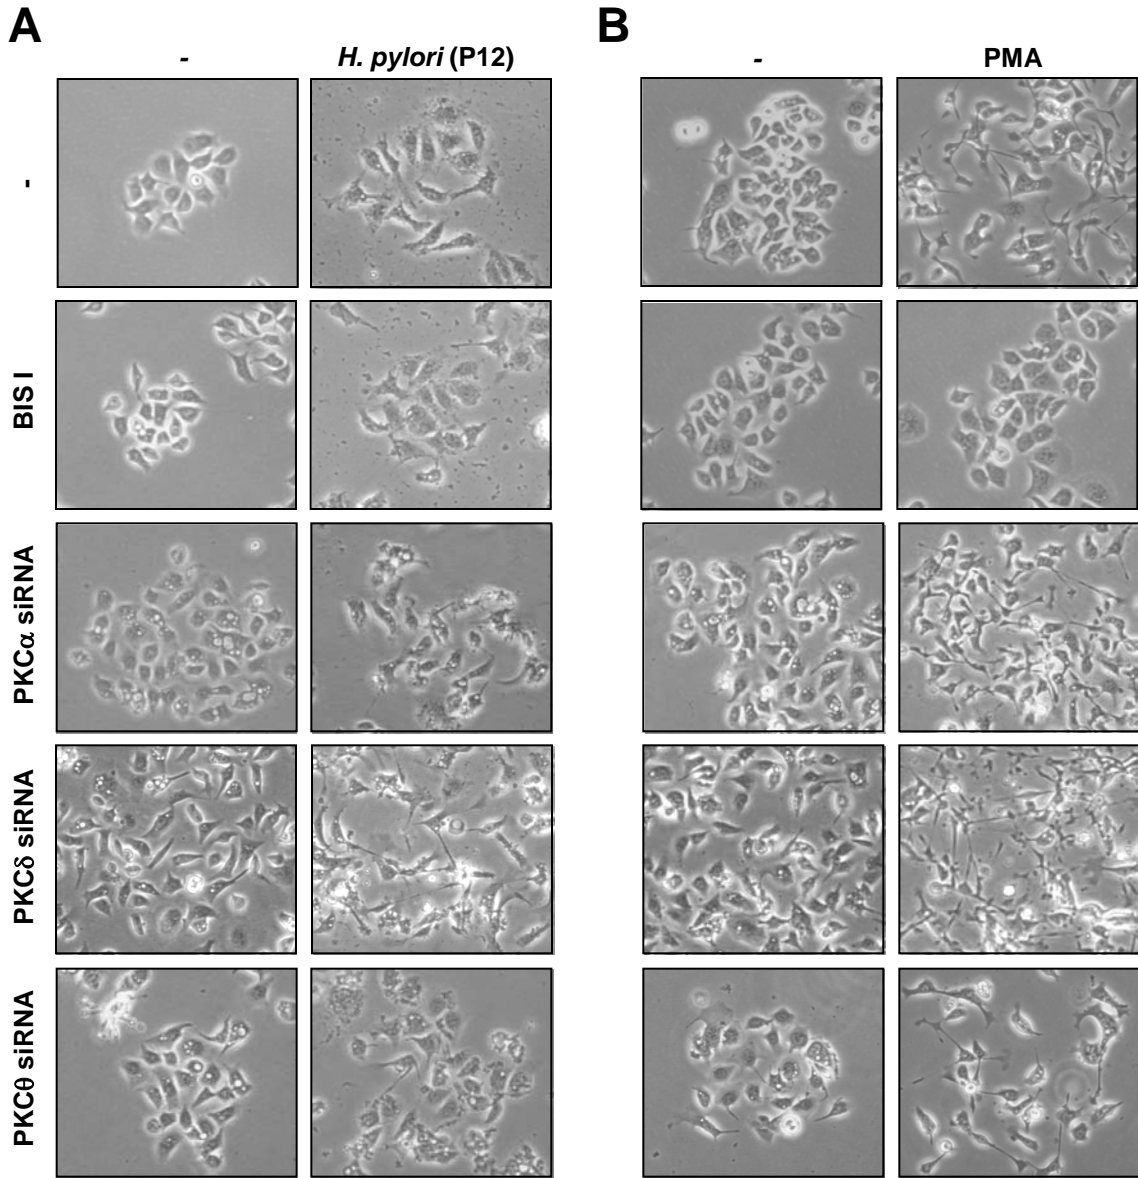

Supplement: gut_figures_302103.pdf [file gut_figures_302103.pdf]
